# Supplementary material
Source: Research Square preprint supplement (doi:10.21203/rs.3.rs-10129855/v1)
Supplement: Supplementary file 1 [file 0334e197ee3f62d1763f53ff.xlsx]

## Sheet: OV-SA00_vs_ORFV_PT0001_INSA2026
OV-SA00	ORFV/Hs/PT001/2025	Similarity	Gene
AAR98229.1	-	-	ORF001
AAR98230.1	ORF051	0.46	ORF002
AAR98231.1	-	-	ORF005
AAR98232.1	ORF007	0.93	ORF007
AAR98233.1	ORF008	0.98	ORF008
AAR98234.1	ORF009	1	ORF009
AAR98235.1	ORF010	0.99	ORF010
AAR98236.1	ORF011	0.99	ORF011
AAR98237.1	ORF012	0.99	ORF012
AAR98238.1	ORF013	0.97	ORF013
AAR98239.1	ORF014	0.99	ORF014
AAR98240.1	ORF015	0.97	ORF015
AAR98241.1	ORF016	0.98	ORF016
AAR98242.1	ORF017	0.99	ORF017
AAR98243.1	ORF018	1	ORF018
AAR98244.1	ORF019	0.99	ORF019
AAR98245.1	ORF020	0.99	ORF020
AAR98246.1	ORF021	0.99	ORF021
AAR98247.1	ORF022	0.99	ORF022
AAR98248.1	ORF023	1	ORF023
AAR98249.1	ORF024	0.95	ORF024
AAR98250.1	ORF025	1	ORF025
AAR98251.1	ORF026	1	ORF026
AAR98252.1	ORF027	0.99	ORF027
AAR98253.1	ORF028	0.98	ORF028
AAR98254.1	ORF029	0.99	ORF029
AAR98255.1	ORF030	1	ORF030
AAR98256.1	ORF031	0.99	ORF031
AAR98257.1	ORF032	0.96	ORF032
AAR98258.1	ORF033	0.99	ORF033
AAR98259.1	ORF034	1	ORF034
AAR98260.1	ORF035	1	ORF035
AAR98261.1	ORF036	1	ORF036
AAR98262.1	ORF037	1	ORF037
AAR98263.1	ORF039	0.98	ORF039
AAR98264.1	ORF038	0.99	ORF038
AAR98265.1	ORF040	0.99	ORF040
AAR98266.1	ORF041	0.98	ORF041
AAR98267.1	ORF042	0.98	ORF042
AAR98268.1	ORF043	0.98	ORF043
AAR98269.1	ORF044	0.98	ORF044
AAR98270.1	ORF045	1	ORF045
AAR98271.1	ORF046	0.97	ORF046
AAR98272.1	ORF047	0.99	ORF047
AAR98273.1	ORF048	0.98	ORF048
AAR98274.1	ORF049	0.98	ORF049
AAR98275.1	ORF050	0.98	ORF050
AAR98276.1	ORF051	0.98	ORF051
AAR98277.1	ORF052	0.99	ORF052
AAR98278.1	ORF053	1	ORF053
AAR98279.1	ORF054	0.99	ORF054
AAR98280.1	ORF055	0.99	ORF055
AAR98281.1	ORF056	1	ORF056
AAR98282.1	ORF057	0.98	ORF057
AAR98283.1	ORF058	0.99	ORF058
AAR98284.1	ORF059	0.99	ORF059
AAR98285.1	ORF060	1	ORF060
AAR98286.1	ORF061	0.94	ORF061
AAR98287.1	ORF062	0.99	ORF062
AAR98288.1	ORF063	0.97	ORF063
AAR98289.1	ORF064	1	ORF064
AAR98290.1	ORF065	1	ORF065
AAR98291.1	ORF066	0.81	ORF066
AAR98292.1	ORF067	0.98	ORF067
AAR98293.1	ORF068	0.99	ORF068
AAR98294.1	ORF069	1	ORF069
AAR98295.1	ORF070	0.96	ORF070
AAR98296.1	ORF071	1	ORF071
AAR98297.1	ORF072	1	ORF072
AAR98298.1	ORF073	0.96	ORF073
AAR98299.1	ORF074	0.99	ORF074
AAR98300.1	ORF075	0.99	ORF075
AAR98301.1	ORF076	0.99	ORF076
AAR98302.1	ORF077	1	ORF077
AAR98303.1	ORF078	1	ORF078
AAR98304.1	ORF079	0.99	ORF079
AAR98305.1	ORF080	0.95	ORF080
AAR98306.1	ORF081	1	ORF081
AAR98307.1	ORF082	0.98	ORF082
AAR98308.1	ORF083	1	ORF083
AAR98309.1	ORF084	1	ORF084
AAR98310.1	ORF085	0.98	ORF085
AAR98311.1	ORF086	0.99	ORF086
AAR98312.1	ORF087	1	ORF087
AAR98313.1	ORF088	0.94	ORF088
AAR98314.1	ORF089	0.98	ORF089
AAR98315.1	ORF090	0.99	ORF090
AAR98316.1	ORF091	1	ORF091
AAR98317.1	ORF092	0.99	ORF092
AAR98318.1	ORF093	0.99	ORF093
AAR98319.1	ORF094	0.99	ORF094
AAR98320.1	ORF095	1	ORF095
AAR98321.1	ORF096	0.98	ORF096
AAR98322.1	ORF098	0.98	ORF098
AAR98323.1	ORF097	1	ORF097
AAR98324.1	ORF099	1	ORF099
AAR98325.1	ORF100	0.99	ORF100
AAR98326.1	ORF101	1	ORF101
AAR98327.1	-	-	ORF102
AAR98328.1	-	-	ORF103
AAR98329.1	ORF104	0.99	ORF104
AAR98330.1	-	-	ORF105
AAR98331.1	ORF106	0.99	ORF106
AAR98332.1	ORF107	0.98	ORF107
AAR98333.1	ORF108	0.94	ORF108
AAR98334.1	-	-	ORF109
AAR98335.1	-	-	ORF110
AAR98336.1	ORF111	0.99	ORF111
AAR98337.1	ORF112	0.85	ORF112
AAR98338.1	ORF113	0.91	ORF113
AAR98339.1	ORF114	0.99	ORF114
AAR98340.1	ORF115	0.99	ORF115
AAR98341.1	ORF116	0.9	ORF116
AAR98342.1	ORF117	0.98	ORF117
AAR98343.1	ORF118	0.97	ORF118
AAR98344.1	ORF119	0.97	ORF119
AAR98345.1	ORF120	0.83	ORF120
AAR98346.1	ORF121	0.93	ORF121
AAR98347.1	ORF122	0.97	ORF122
AAR98348.1	ORF123	0.98	ORF123
AAR98349.1	ORF124	0.98	ORF124
AAR98350.1	ORF125	0.96	ORF125
AAR98351.1	ORF126	0.98	ORF126
AAR98352.1	ORF127	0.95	ORF127
AAR98353.1	ORF128	0.98	ORF128
AAR98354.1	ORF129	0.98	ORF129
AAR98355.1	ORF130	0.99	ORF130
AAR98356.1	ORF131	0.99	ORF131
AAR98357.1	ORF132	0.88	ORF132
AAR98358.1	-	-	ORF134
